# Supplementary material
Source: PubMed Central journal article supplement (PMC6201271)
Supplement: NIHMS1506178-supplement-1.pdf [file NIHMS1506178-supplement-1.pdf]

## Supplementary Information

### Regulation of UvrD Helicase Activity by MutL

Yerdos A. Ordabayev, Binh Nguyen, Anita Niedziela-Majka and Timothy M. Lohman

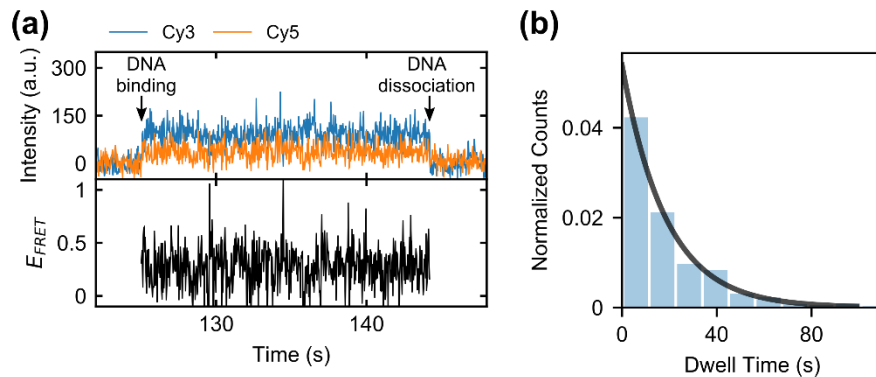

**Supplementary Fig. 1.** DNA binding to and dissociation from surface immobilized biotin-UvrD monomers. (a) Example of a time trace for binding to and dissociation of DNA (1 nM) from a surface-immobilized UvrD monomer at 5  $\mu$ M ATP in imaging buffer at 25  $^{\circ}$ C. (b) Histogram of the dwell times of DNA bound to UvrD and a single exponential fit (black line) indicating a dissociation rate constant of  $0.054 \pm 0.002$  s $^{-1}$ .

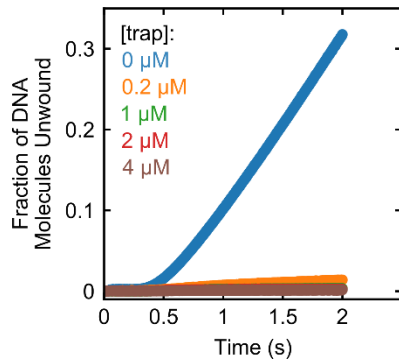

**Supplementary Fig. 2.** Protein trap test. Stopped-flow experiments were performed with 160 nM UvrD and 250 nM MutL dimer in one syringe and mixing vs. 50 nM 3'-(dT)<sub>20</sub>-ds18-BHQ2/Cy5, 1 mM ATP, 2 mM MgCl<sub>2</sub>, plus varying concentrations of 10-bp DNA hairpin with a 3'-(dT)<sub>40</sub> ssDNA tail (protein trap) (0 μM (blue); 0.2 μM (orange); 1 μM (green); 2 μM (red); 4 μM (brown)) in buffer T at 25 °C.

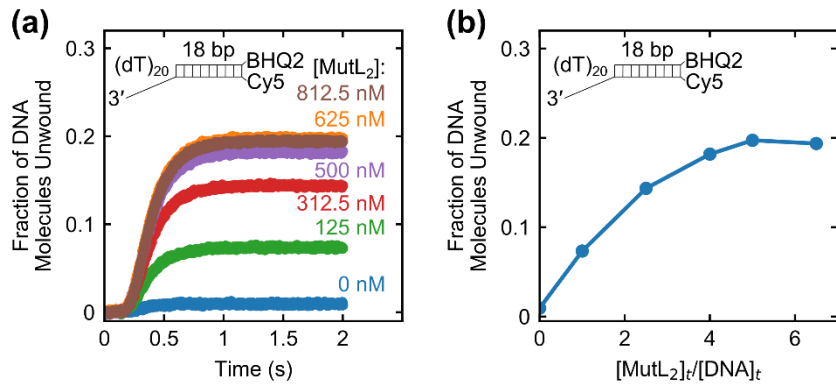

**Supplementary Fig. 3.** Effects of MutL concentration on UvrD activation. (a) Stopped-flow DNA unwinding time courses performed with 125 nM 3'-(dT)<sub>20</sub>-ds18-BHQ2/Cy5 and 50 nM UvrD as a function of MutL dimer concentration (0 nM (blue); 125 nM (green); 312.5 nM (red); 500 nM (purple); 625 nM (orange); 812.5 nM (brown)) in buffer T at 25 °C. (b) Fraction of DNA molecules unwound plotted as a function of [MutL<sub>2</sub>]<sub>t</sub>/[DNA]<sub>t</sub>.

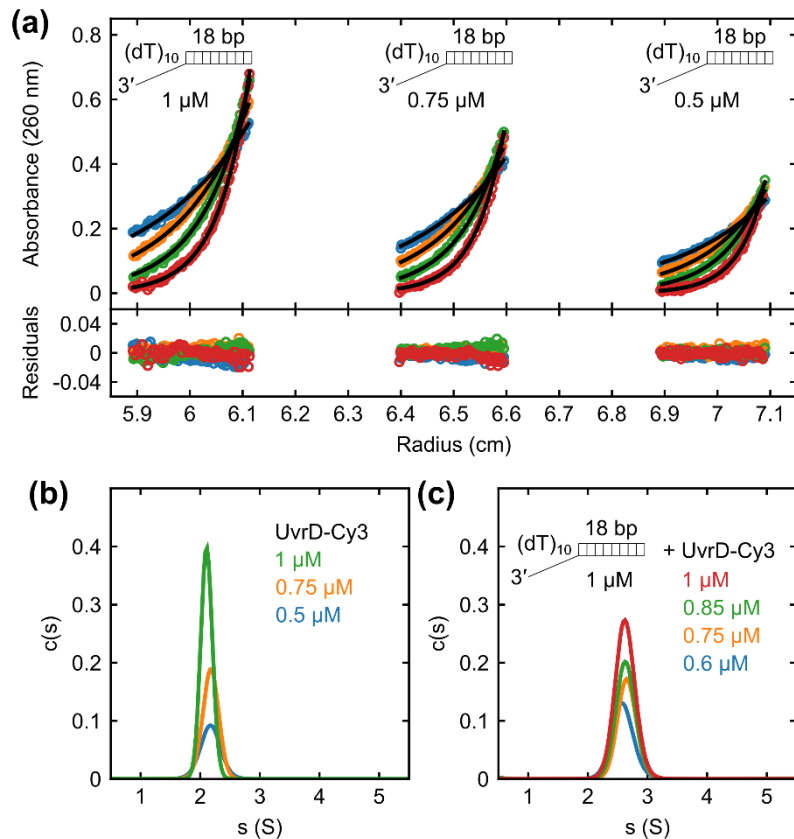

**Supplementary Fig. 4.** UvrD-Cy3 binds to 3'-(dT)<sub>10</sub>-ds18 as a monomer in buffer M20/20. (a) Sedimentation equilibrium experiments of 3'-(dT)<sub>10</sub>-ds18 (0.5 μM, 0.75 μM, 1 μM) were performed in buffer M20/20 at 25 °C. Global analysis of absorbance profiles at 260 nm shows a single species at four rotor speeds (18k rpm (blue); 22k rpm (orange); 27k rpm (green); 33k rpm (red)). Smooth curves are simulations using best fit parameters with residuals shown below the plots. (b,c) Sedimentation velocity experiments monitoring the Cy3 absorbance of UvrD-Cy3 at 555 nm were performed at 42k rpm in buffer M20/20 at 25 °C. (b) Continuous sedimentation coefficient distributions  $c(s)$  of UvrD-Cy3 at three concentrations (0.5 μM (blue); 0.75 μM (orange); 1 μM (green)) show a single peak at  $2.15 \pm 0.02$  S. (c)  $c(s)$  distributions of UvrD-Cy3 at four concentrations (0.6 μM (blue); 0.75 μM (orange); 0.85 μM (green); 1 μM (red)) in complex with 3'-(dT)<sub>10</sub>-ds18 (1 μM) show a single peak at  $2.63 \pm 0.02$  S.

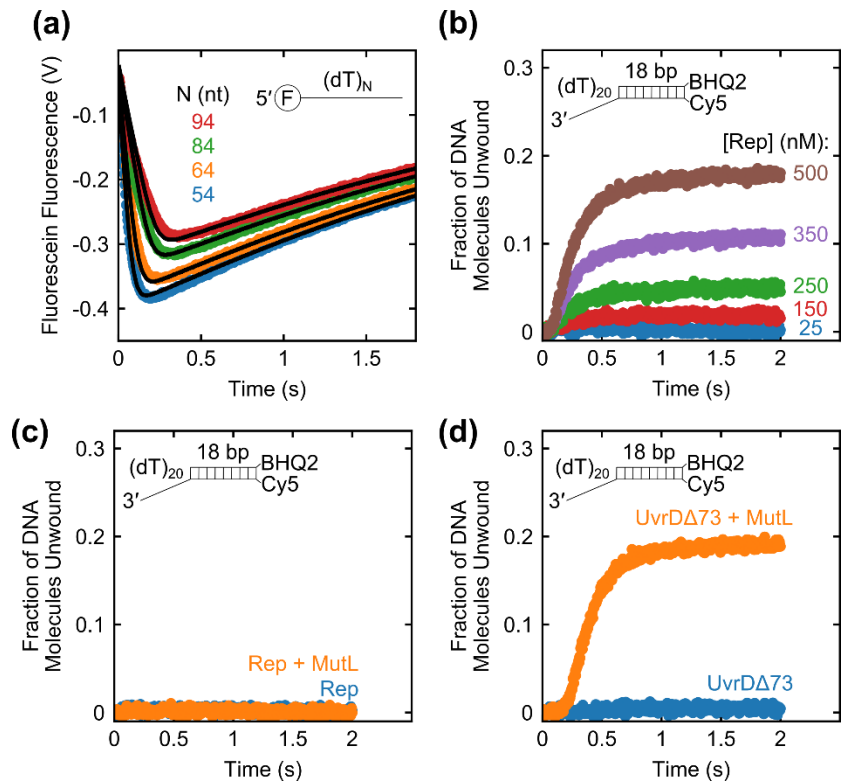

**Supplementary Fig. 5.** MutL specifically stimulates UvrD helicase. (a) Time courses for stopped-flow ssDNA translocation experiments performed with Rep (50 nM) and a series of 5'-F-(dT)<sub>N</sub> (N = 54, 64, 84, 94 nt) (100 nM) to ensure that no more than one Rep monomer is bound per DNA. The macroscopic translocation rate ( $mk_t$ ) of a Rep monomer determined from NLLS analysis (see Methods) is  $293 \pm 16$  nt/s. (b,c,d) Stopped-flow DNA unwinding time courses for experiments performed with 3'-(dT)<sub>20</sub>-ds18-BHQ2/Cy5 in buffer T at 25 °C (b) DNA (50 nM) was pre-incubated with Rep at varying concentrations (25 nM (blue); 150 nM (red); 250 nM (green); 350 nM (purple); 500 nM (brown)). Helicase activity is observed only for [Rep]  $\gg$  [DNA]. (c) DNA (50 nM) was pre-incubated with 25 nM Rep (blue) or 25 nM Rep plus 250 nM MutL dimer (orange), favoring Rep monomer bound to the DNA. (d) DNA was pre-incubated with 25 nM UvrD $\Delta$ 73 (blue) or 25 nM UvrD $\Delta$ 73 plus 250 nM MutL dimer (orange).

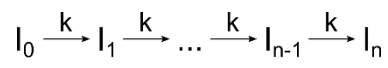

Supplementary Scheme 1

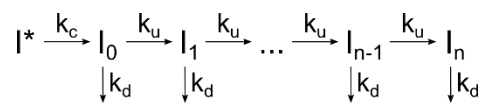

Supplementary Scheme 2

**Supplementary Table 1.** Hydrodynamic properties of 3'-(dT)<sub>10</sub>-ds18, UvrD-Cy3, MutL<sub>2</sub>, and their complexes in buffer M20/20

| Species                        | $M$<br>(kg/mol) | $\bar{v}_{calc}^b$<br>(ml/g) | $S_{20,w}$<br>(S) | $f/f_0$     | $M_{predicted}$<br>(kg/mol) | $\bar{v}_{exp}^c$<br>(ml/g) |
|--------------------------------|-----------------|------------------------------|-------------------|-------------|-----------------------------|-----------------------------|
| 3'-(dT) <sub>10</sub> -ds18    | 14.044          | -                            | -                 | -           | -                           | 0.563 ± 0.002               |
| UvrD-Cy3                       | 84.672          | 0.7308                       | 4.66 ± 0.05       | 1.46 ± 0.02 | 82.3 ± 1.2                  | 0.737 ± 0.003               |
| MutL <sub>2</sub> <sup>a</sup> | 135.824         | 0.7414                       | 4.88 ± 0.04       | 1.88 ± 0.02 | 130.2 ± 6.9                 | 0.750 ± 0.010               |
| UvrD-DNA                       | 98.717          | 0.712                        | 5.63 ± 0.03       | 1.40 ± 0.01 | 92.4 ± 1.4                  | 0.727 ± 0.003               |
| MutL <sub>2</sub> -UvrD-DNA    | 234.540         | 0.734                        | -                 | -           | 235 ± 6                     | 0.734 ± 0.005               |

<sup>a</sup> Niedziela-Majka *et al.*<sup>1</sup>

<sup>b</sup> Calculated from the amino acid composition using SEDNTERP<sup>2</sup> for UvrD-Cy3 and MutL<sub>2</sub> as well as weight-average partial specific volumes for UvrD-DNA and MutL<sub>2</sub>-UvrD-DNA complexes according to Eq. (7)

<sup>c</sup> Estimated from sedimentation equilibrium analysis by constraining to the known molecular mass of the species

**Supplementary Table 2.** DNA substrate sequences

| dsDNA pairs | Length (nt) | Oligonucleotide sequence                                                                                                                 |
|-------------|-------------|------------------------------------------------------------------------------------------------------------------------------------------|
| I           | 19          | 5'-(Y) GCC CTG CTG CCG ACC AAC-3'                                                                                                        |
| I           | 39          | 5'-(X) GTT GGT CGG CAG CAG GGC (dT) <sub>20</sub> -3'                                                                                    |
| II          | 19          | 5'-GCC CTG CTG CCG ACC AAC (Q)-3'                                                                                                        |
| II          | 19 + N      | 5'-(Y) GTT GGT CGG CAG CAG GGC (dT) <sub>N</sub> -3'                                                                                     |
| III         | 22          | 5'-GCC CTG CTG CCG ACC AAC GAT (Q)-3'                                                                                                    |
| III         | 42          | 5'-(Y) ATC GTT GGT CGG CAG CAG GGC (dT) <sub>20</sub> -3'                                                                                |
| IV          | 26          | 5'-GCC CTG CTG CCG ACC AAC GAT GGT T (Q)-3'                                                                                              |
| IV          | 26 + N      | 5'-(Y) AAC CAT CGT TGG TCG GCA GCA GGG C (dT) <sub>N</sub> -3'                                                                           |
| V           | 33          | 5'-GCC CTG CTG CCG ACC AAC GAT GGT TAC ATT CC (Q)-3'                                                                                     |
| V           | 33 + N      | 5'-(Y) GGA ATG TAA CCA TCG TTG GTC GGC AGC AGG GC (dT) <sub>N</sub> -3'                                                                  |
| VI          | 41          | 5'-GCC CTG CTG CCG ACC AAC GAT GGT TAC ATT CCC GCT GCT G (Q)-3'                                                                          |
| VI          | 41 + N      | 5'-(Y) CAG CAG CGG GAA TGT AAC CAT CGT TGG TCG GCA GCA GGG C (dT) <sub>N</sub> -3'                                                       |
| VII         | 51          | 5'-GCC CTG CTG CCG ACC AAC GAT GGT TAC ATT CCC GCT GCT GCT AGT GCA GG(Q)-3'                                                              |
| VII         | 51 + N      | 5'-(Y) CCT GCA CTA GCA GCA GCG GGA ATG TAA CCA TCG TTG GTC GGC AGC AGG GC (dT) <sub>N</sub> -3'                                          |
| VIII        | 81          | 5'-GCC CTG CTG CCG ACC AAC GAT GGT TAC ATT CCC GCT GCT GCT AGT CGA GGT AGC GTT CAC GTC GCA TTC GAC GCT CGA CG (Q)-3'                     |
| VIII        | 95          | 5'-(Y) CGT CGA GCG TCG AAT GCG ACG TGA ACG CTA CCT CGA CTA GCA GCA GCG GGA ATG TAA CCA TCG TTG GTC GGC AGC AGG GC (dT) <sub>14</sub> -3' |
| IX          | 18          | 5'-GCC CTG CTG CCG ACC AAC-3'                                                                                                            |
| IX          | 28          | 5'-GTT GGT CGG CAG CAG GGC (dT) <sub>10</sub> -3'                                                                                        |
| X           | 65          | 5'-GCC TCG CTG CTT TTT GCA GCG AGG C (dT) <sub>40</sub> -3'                                                                              |

X = Cy3; Y = Cy5; Q = BHQ2



1. Niedziela-Majka, A., Maluf, N.K., Antony, E. & Lohman, T.M. Self-assembly of Escherichia coli MutL and its complexes with DNA. *Biochemistry* **50**, 7868-80 (2011).
2. Laue, T.M., Shah, B.D, Ridgeway, T.M. and Pelletier, S.L. *Computer-aided interpretation of analytical sedimentation data for proteins.*, 90-125 (Royal Society of Chemistry, Cambridge, UK, 1992).
